# Supplementary material for: Beyond the Gender Binary: Wage Inequality and Occupational Segregation among Transgender and Nonbinary Workers
Source: Research Square preprint supplement (doi:10.21203/rs.3.rs-8080057/v1), 2025-11-24
Supplement: Supplementary file 1 [file 240700251137c93cafe5b097.docx]

**Appendix**

**Table A1: Descriptive statistics: individuals aged 18-64, not in school, and employed in 2020 (row percentage)**

|  | Cisgender  men | Cisgender  women | Transgender  men | Transgender  women | Non-binary  AMAB | Non-binary  AFAB |
| --- | --- | --- | --- | --- | --- | --- |
| Occupational Teer |  |  |  |  |  |  |
| Teer 0 | 60.70% | 39.11% | 0.05% | 0.06% | 0.03% | 0.05% |
| Teer 1 | 45.24% | 54.45% | 0.05% | 0.09% | 0.05% | 0.10% |
| Teer 2 | 63.91% | 35.83% | 0.08% | 0.07% | 0.04% | 0.07% |
| Teer 3 | 45.42% | 54.32% | 0.07% | 0.09% | 0.03% | 0.07% |
| Teer 4 | 47.34% | 52.32% | 0.09% | 0.10% | 0.04% | 0.10% |
| Teer 5 | 58.38% | 41.25% | 0.12% | 0.11% | 0.04% | 0.09% |
| Occupational Group |  |  |  |  |  |  |
| Legislative and senior management | 69.23% | 30.62% | 0.05% | 0.05% | 0.02% | 0.03% |
| Business, finance and administration | 31.86% | 67.91% | 0.05% | 0.08% | 0.03% | 0.07% |
| Natural and applied sciences | 76.09% | 23.62% | 0.06% | 0.08% | 0.08% | 0.06% |
| Health | 19.20% | 80.57% | 0.05% | 0.11% | 0.01% | 0.06% |
| Education, law and social | 33.90% | 65.76% | 0.07% | 0.10% | 0.04% | 0.13% |
| Art, culture, recreation and sport | 47.83% | 51.35% | 0.12% | 0.14% | 0.13% | 0.44% |
| Sales and service | 47.49% | 52.13% | 0.11% | 0.11% | 0.05% | 0.11% |
| Trades, transport and equipment | 91.46% | 8.37% | 0.08% | 0.05% | 0.03% | 0.02% |
| Natural resources, agriculture | 81.00% | 18.77% | 0.08% | 0.06% | 0.04% | 0.06% |
| Manufacturing and utilities | 73.34% | 26.46% | 0.08% | 0.07% | 0.03% | 0.03% |
| Industry sectors |  |  |  |  |  |  |
| Agriculture, forestry, fishing and hunting | 69.52% | 30.25% | 0.08% | 0.07% | 0.03% | 0.05% |
| Mining, quarrying, and oil and gas | 82.18% | 17.66% | 0.07% | 0.04% | 0.03% | 0.02% |
| Utilities | 75.15% | 24.73% | 0.04% | 0.05% | 0.02% | 0.02% |
| Construction | 86.09% | 13.74% | 0.08% | 0.06% | 0.02% | 0.01% |
| Manufacturing | 72.69% | 27.12% | 0.07% | 0.06% | 0.03% | 0.03% |
| Wholesale trade | 67.49% | 32.33% | 0.06% | 0.05% | 0.03% | 0.03% |
| Retail trade | 49.72% | 49.89% | 0.12% | 0.11% | 0.05% | 0.11% |
| Transportation and warehousing | 74.79% | 25.01% | 0.08% | 0.07% | 0.03% | 0.02% |
| Information and cultural industries | 60.46% | 38.95% | 0.09% | 0.14% | 0.13% | 0.23% |
| Finance and insurance | 43.09% | 56.75% | 0.04% | 0.06% | 0.02% | 0.03% |
| Real estate and rental and leasing | 53.43% | 46.38% | 0.07% | 0.06% | 0.01% | 0.04% |
| Professional, scientific and technical services | 57.29% | 42.38% | 0.06% | 0.10% | 0.08% | 0.10% |
| Management of companies and enterprises | 48.02% | 51.70% | 0.11% | 0.08% | 0.06% | 0.06% |
| Administrative and support, waste management and remediation services | 60.34% | 39.31% | 0.08% | 0.11% | 0.06% | 0.10% |
| Educational services | 30.42% | 69.29% | 0.06% | 0.09% | 0.03% | 0.12% |
| Health care and social assistance | 19.09% | 80.62% | 0.06% | 0.11% | 0.02% | 0.09% |
| Arts, entertainment and recreation | 53.32% | 45.99% | 0.10% | 0.12% | 0.12% | 0.36% |
| Accommodation and food services | 46.48% | 53.05% | 0.15% | 0.11% | 0.07% | 0.15% |
| Other services | 52.47% | 47.18% | 0.09% | 0.09% | 0.05% | 0.14% |
| Public administration | 51.32% | 48.43% | 0.06% | 0.07% | 0.04% | 0.08% |

Notes: Weighted descriptive statistics are calculated from individuals aged 18–64 who were not enrolled in school and were employed in 2020, based on the 2021 Canadian long-form Census. The table reports the proportional distribution of each gender identity across occupational TEER categories, occupational groups, and industry sectors. “Row percentages” indicate the share of each gender identity within a given category. AMAB = assigned male at birth; AFAB = assigned female at birth.

**Table A2: Estimated difference in log hourly wage in full-time workers across gender identities relative to cisgender men**

|  | (1) | (2) | (3) |
| --- | --- | --- | --- |
| Cisgender women | -0.109*** | -0.159*** | -0.139*** |
|  | (0.001) | (0.001) | (0.001) |
| Transgender men | -0.298*** | -0.195*** | -0.158*** |
|  | (0.024) | (0.023) | (0.022) |
| Transgender women | -0.266*** | -0.251*** | -0.227*** |
|  | (0.022) | (0.021) | (0.021) |
| Non-binary AMAB | -0.170*** | -0.137*** | -0.131*** |
|  | (0.032) | (0.030) | (0.029) |
| Non-binary AFAB | -0.301*** | -0.259*** | -0.189*** |
|  | (0.022) | (0.021) | (0.021) |
| Potential experience  and its square |  | x | x |
| Immigration |  | x | x |
| Race |  | x | x |
| Marital Status |  | x | x |
| Parent |  | x | x |
| Education |  | x | x |
| Areas of residence |  | x | x |
| Provinces |  | x | x |
| Occupational group |  |  | x |
| Teer |  |  | x |
| Industry group |  |  | x |
| Weighted N | 9,640,300 | 9,640,300 | 9,640,300 |
| R Square | 0.005 | 0.133 | 0.201 |

Notes: Estimated coefficients are from linear regressions of log hourly wages on gender identity, with cisgender men as the reference group for full-time workers. Model (1) is unadjusted; Model (2) adds controls for potential experience and its square, immigrant status, race, marital status, parental status, education, area of residence, and province; Model (3) further adjusts for occupation group, TEER category, and industry sector. Robust standard errors are reported in parentheses. The number of observations is rounded to the nearest ten as required by Statistics Canada. Significance levels: *** p < 0.01, ** p < 0.05, * p < 0.10. AMAB = assigned male at birth; AFAB = assigned female at birth.

**Table A3: Estimated difference in labor market outcomes across gender identities relative to cisgender men workers**

|  | Annual wage | Annual wage in 2019 | Annual earning | Weekly wage | Weekly earning | Working weeks | Working hours |
| --- | --- | --- | --- | --- | --- | --- | --- |
| Cisgender women | -0.283*** | -0.274*** | -0.290*** | -0.218*** | -0.225*** | -1.803*** | -4.468*** |
|  | (0.001) | (0.001) | (0.001) | (0.001) | (0.001) | (0.017) | (0.021) |
| Transgender men | -0.192*** | -0.208*** | -0.208*** | -0.115*** | -0.128*** | -1.805*** | -2.904*** |
|  | (0.020) | (0.020) | (0.020) | (0.020) | (0.020) | (0.289) | (0.344) |
| Transgender women | -0.336*** | -0.292*** | -0.326*** | -0.201*** | -0.195*** | -3.126*** | -5.142*** |
|  | (0.020) | (0.018) | (0.019) | (0.019) | (0.018) | (0.271) | (0.306) |
| Non-binary AMAB | -0.307*** | -0.244*** | -0.313*** | -0.198*** | -0.201*** | -3.023*** | -4.401*** |
|  | (0.029) | (0.027) | (0.028) | (0.027) | (0.026) | (0.386) | (0.482) |
| Non-binary AFAB | -0.459*** | -0.410*** | -0.475*** | -0.334*** | -0.353*** | -3.762*** | -6.240*** |
|  | (0.020) | (0.020) | (0.019) | (0.018) | (0.017) | (0.273) | (0.319) |
| Weighted N | 13,688,720 | 13,496,300 | 14,544,520 | 13,688,720 | 14,544,520 | 14,544,520 | 14,544,520 |
| R Square | 0.266 | 0.257 | 0.268 | 0.188 | 0.192 | 0.093 | 0.102 |

Notes: Estimates are derived from separate regressions of each labor market outcome on gender identity, using cisgender men as the reference group. Outcomes include log annual wage (2020), log annual wage (2019), log total annual earnings (2020), log weekly wage (2020), log weekly earnings (2020), number of working weeks in 2020, and usual weekly working hours (measured for the 2021 reference week, May 2–8). All models control for potential experience and its square, immigrant status, race, marital status, parental status, education, area of residence, province, occupation group, TEER category, and industry sector. Robust standard errors are shown in parentheses. Regressions are weighted using individual Census sampling weights. The number of observations is rounded to the nearest ten as required by Statistics Canada. Significance levels: *** p < 0.01, ** p < 0.05, * p < 0.10. AMAB = assigned male at birth; AFAB = assigned female at birth.
